# Supplementary material for: Impact of the numerical solution approach of a plant hydrodynamic model (v0.1) on vegetation dynamics
Source: Copernicus journal article supplement (doi:10.5194/gmd-15-6385-2022), 2022-08-29
Supplement: Supplementary file 1 [file gmd-15-6385-2022-supplement.pdf]

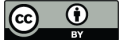

*Supplement of*

## **Impact of the numerical solution approach of a plant hydrodynamic model (v0.1) on vegetation dynamics**

**Yilin Fang et al.**

*Correspondence to:* Yilin Fang (yilin.fang@pnnl.gov)

The copyright of individual parts of the supplement might differ from the article licence.

## Contents of this file

1. Example discretized equations
2. Figures S1, S2, S3, and S4
3. Table S1

Figure S1 is an example of Figure 1 in the manuscript with explicit compartment numbers to illustrate how soil interacts with the roots. In this figure, the roots interact with a total of 10 soil layers. Compartment 1 represents leaf, 2 is stem, 3 is transporting root, 4, 10, ..., 58 are absorbing roots in soil layer 1, 2, ..., and 10, respectively. Each soil shell layer is divided into 5 compartments, with the innermost compartment (i.e., 5, 11, ..., 59) directly interfacing with the absorbing root in each layer. The discretized mass balance equation for each compartment becomes:

$$\rho_w V_1 \frac{d\theta_1}{dt} = Q_{1,2} - E, \text{ for compartment 1, } Q_{1,2} \text{ is positive when flux is towards the atmosphere}$$

$$\rho_w V_2 \frac{d\theta_2}{dt} = Q_{2,3} - Q_{1,2}, \text{ for compartment 2}$$

$$\rho_w V_3 \frac{d\theta_3}{dt} = Q_{3,4} + Q_{3,10} + Q_{3,16} + Q_{3,22} + Q_{3,28} + Q_{3,34} + Q_{3,40} + Q_{3,46} + Q_{3,52} + Q_{3,58} - Q_{2,3}, \text{ for compartment 3}$$

$$\rho_w V_4 \frac{d\theta_4}{dt} = Q_{4,5} - Q_{3,4}, \text{ for compartment 4}$$

$$\rho_w V_5 \frac{d\theta_5}{dt} = Q_{5,6} - Q_{4,5}, \text{ for compartment 5 and similarly for compartments 6,7, and 8}$$

$$\rho_w V_9 \frac{d\theta_9}{dt} = -Q_{8,9}, \text{ for compartment 9}$$

Equation formulations for compartments 10 to 63 in the rest of the soil layers are the same as those corresponding compartments of 4 to 9 in the top layer.

When aggregated, the total number of compartments is reduced by  $(\text{number of layers aggregated} - 1) \times 6$ . For example, when the top two layers are aggregated, compartments 58 to 63 disappear, and the sizes of the new compartments 4 to 9 are the combination of the old compartments 4 and 10, 5 and 11, and so on.

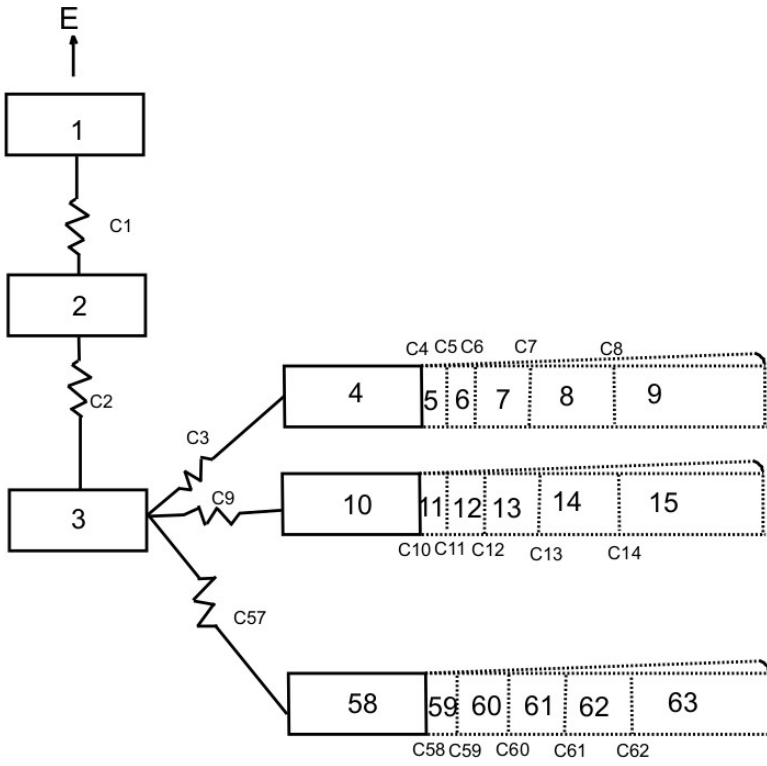

**Figure S1.** Example discretization of FATES-hydro

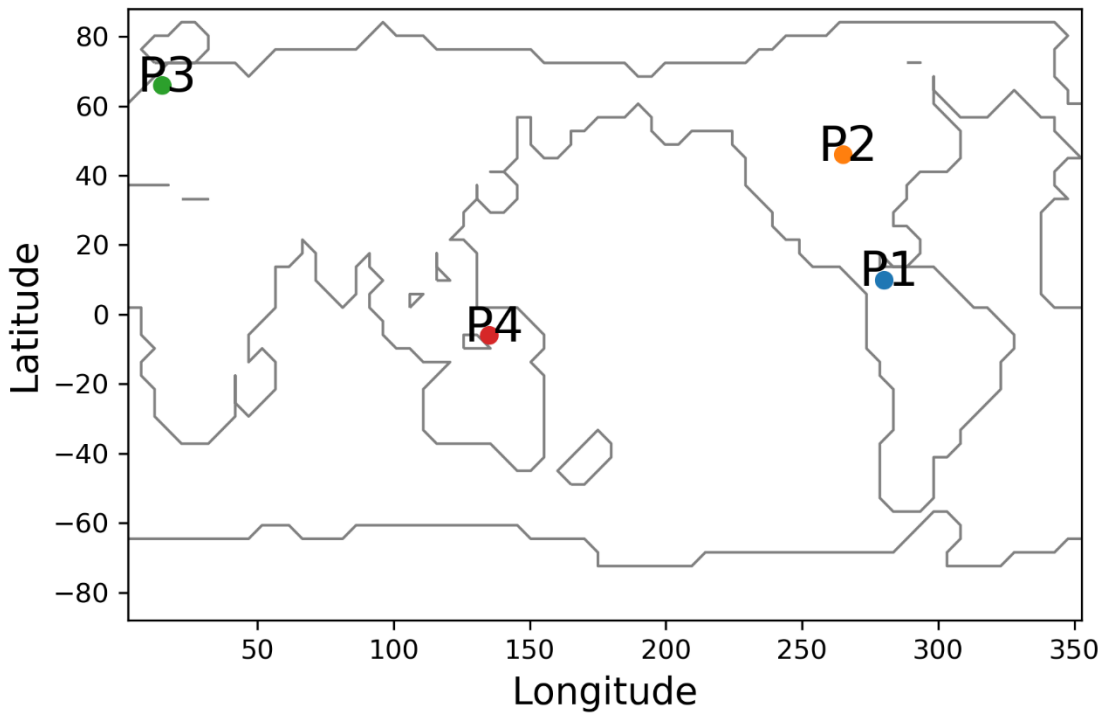

**Figure S2.** Selected points for single point simulations

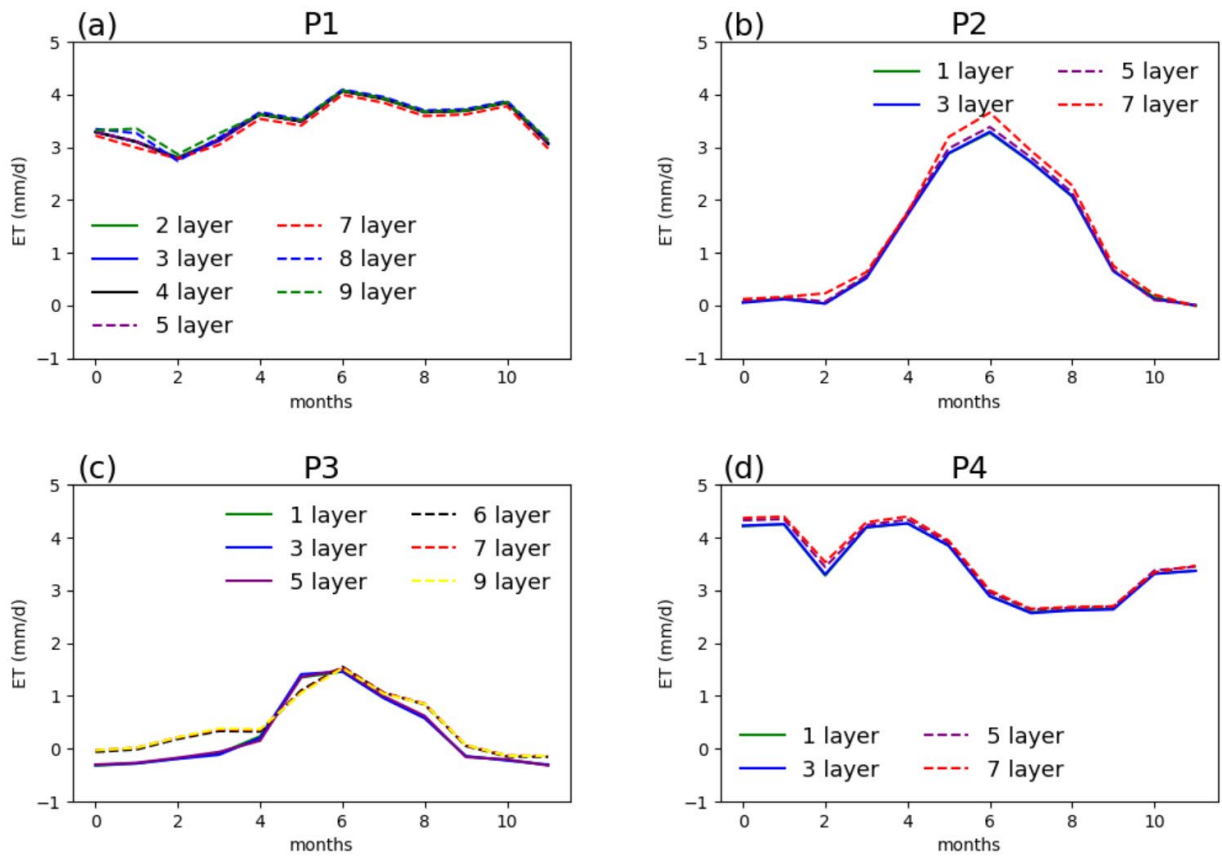

**Figure S3.** Evapotranspiration from single point simulations at selected locations (P1 – P4) at year 100 of the simulations.

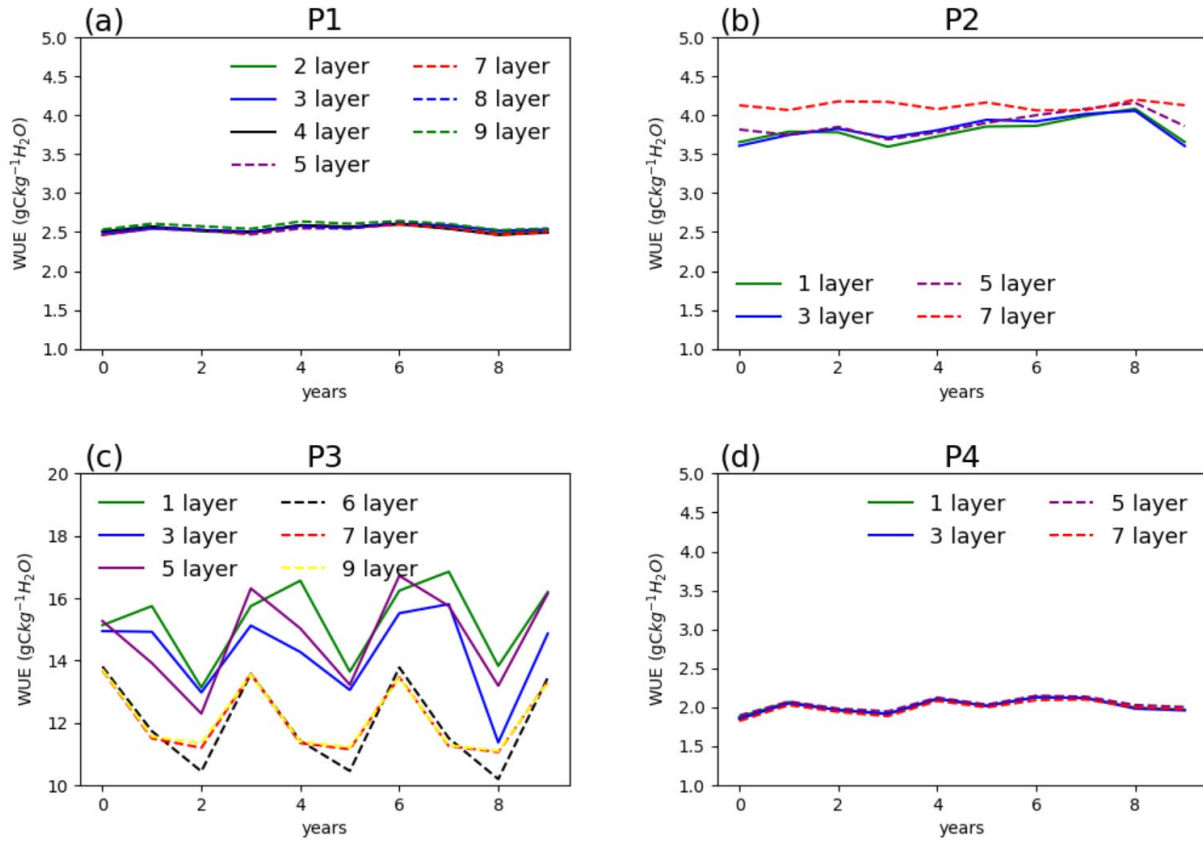

**Figure S4.** Annual water use efficiency (WUE) from single point simulations at selected locations (P1 – P4) during the last 10 years of the simulations.

**Table S1.** Clay content and organic matter density at sites P1 to P4

| P1       |                               | P2       |                               | P3       |                               | P4       |                               |
|----------|-------------------------------|----------|-------------------------------|----------|-------------------------------|----------|-------------------------------|
| Clay (%) | Organic (kg m <sup>-3</sup> ) | Clay (%) | Organic (kg m <sup>-3</sup> ) | Clay (%) | Organic (kg m <sup>-3</sup> ) | Clay (%) | Organic (kg m <sup>-3</sup> ) |
| 30       | 35.5                          | 36       | 51.6                          | 21       | 119.7                         | 35       | 67.9                          |
| 30       | 35.2                          | 36       | 45.3                          | 21       | 111.2                         | 35       | 67.4                          |
| 31       | 30.2                          | 36       | 37.5                          | 21       | 97.7                          | 35       | 60.0                          |
| 32       | 24.8                          | 35       | 29.7                          | 21       | 65.8                          | 27       | 49.4                          |
| 34       | 19.9                          | 35       | 22.7                          | 21       | 50.0                          | 27       | 39.5                          |
| 39       | 15.7                          | 32       | 17.0                          | 21       | 26.6                          | 27       | 31.1                          |
| 42       | 12.4                          | 31       | 12.8                          | 21       | 16.8                          | 27       | 24.3                          |
| 42       | 9.7                           | 30       | 9.7                           | 21       | 10.8                          | 27       | 19.0                          |
| 39       | 0.0                           | 24       | 0.0                           | 20       | 0.0                           | 26       | 0.0                           |
| 40       | 0.0                           | 24       | 0.0                           | 19       | 0.0                           | 26       | 0.0                           |
